# Supplementary material
Source: PubMed Central journal article supplement (PMC1904115)

|                   | $(\text{DPA-C}_2)_2$<br>-TPPS <sub>3</sub> Mn |     | Mn-TPPS <sub>4</sub> |     |
|-------------------|-----------------------------------------------|-----|----------------------|-----|
|                   | -Zn                                           | +Zn | -Zn                  | +Zn |
| pH 6              |                                               |     |                      |     |
| pH 7              |                                               |     |                      |     |
| pH 8              |                                               |     |                      |     |
| pH 8 +<br>poly-CD |                                               |     |                      |     |

*T1* weighted

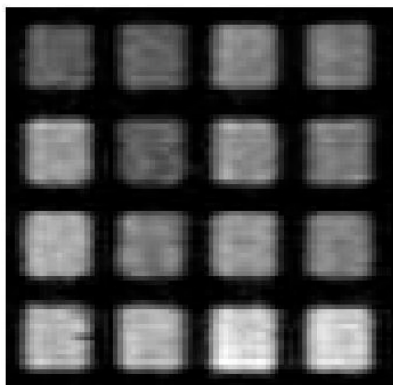

|                   | $(\text{DPA-C}_2)_2$<br>-TPPS <sub>3</sub> Mn |     | Mn-TPPS <sub>4</sub> |     |
|-------------------|-----------------------------------------------|-----|----------------------|-----|
|                   | -Zn                                           | +Zn | -Zn                  | +Zn |
| 500 $\mu\text{M}$ |                                               |     |                      |     |
| 200 $\mu\text{M}$ |                                               |     |                      |     |
| 100 $\mu\text{M}$ |                                               |     |                      |     |
| 50 $\mu\text{M}$  |                                               |     |                      |     |

*T2* weighted

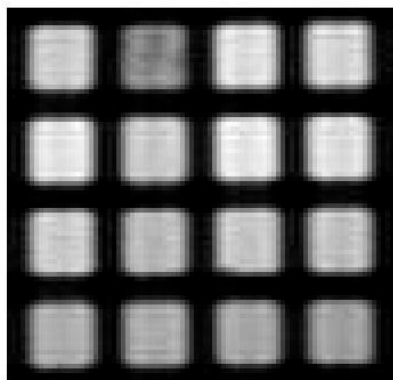

Supplement: pnas_0702393104_3.pdf [file pnas_0702393104_3.pdf]
