# Supplementary material
Source: PubMed Central journal article supplement (PMC1904115)

excitation spectrum

▲ 350-630:648 nm

emission spectrum

▼ 418:435-900 nm

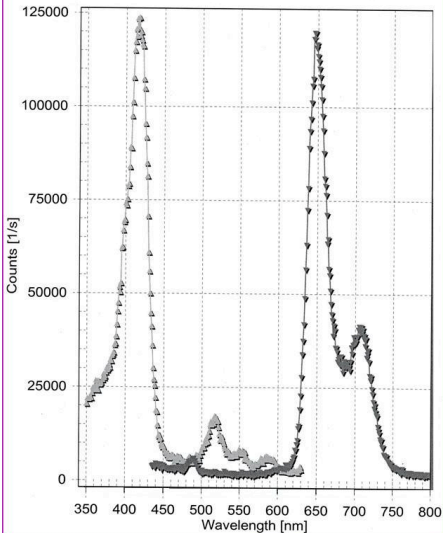

Supplement: pnas_0702393104_1.pdf [file pnas_0702393104_1.pdf]

Fluorescence Response of  $(\text{DPA-C}_2)_2\text{-TPPS}_3$  at different pH

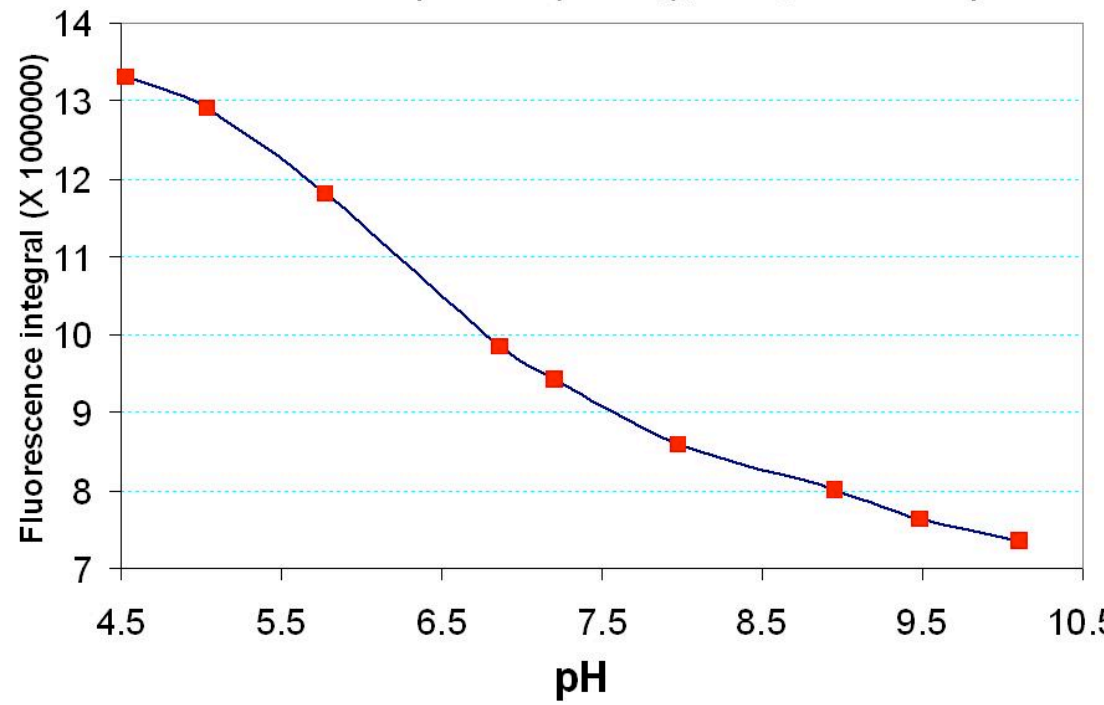

Supplement: pnas_0702393104_2.pdf [file pnas_0702393104_2.pdf]

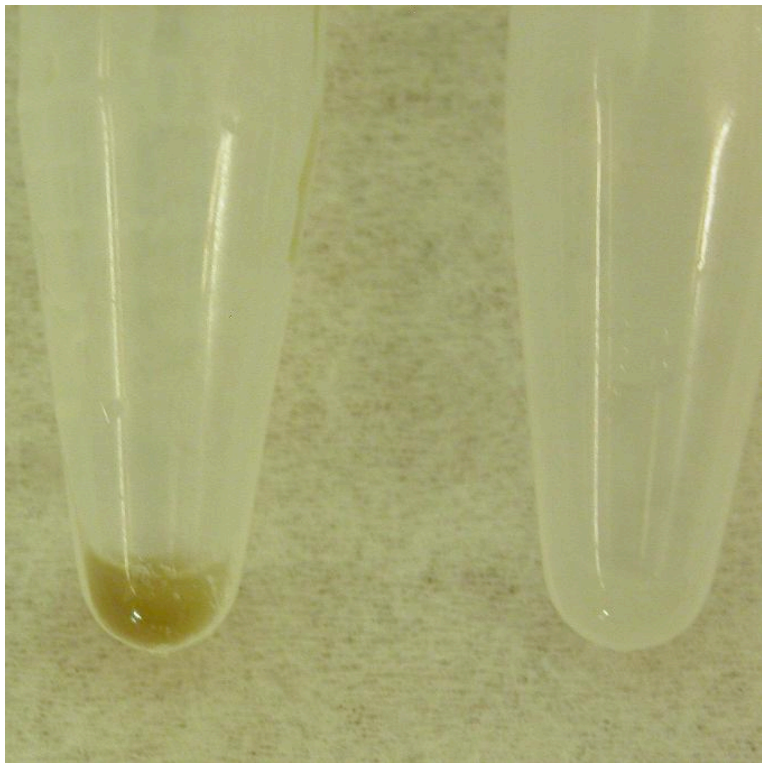

Supplement: pnas_0702393104_4.pdf [file pnas_0702393104_4.pdf]

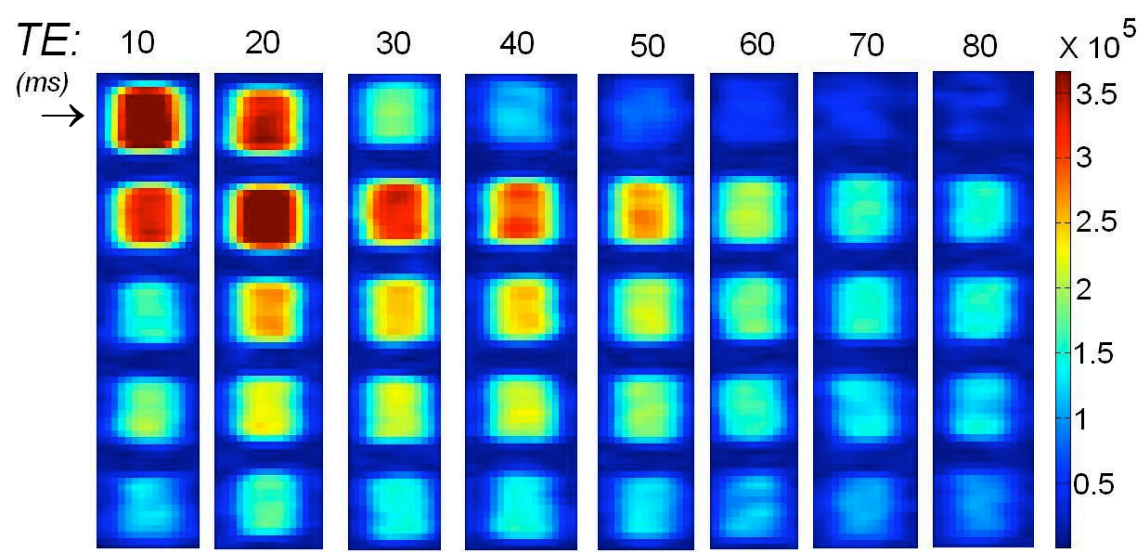

Supplement: pnas_0702393104_5.pdf [file pnas_0702393104_5.pdf]
